# Supplementary material
Source: PubMed Central journal article supplement (PMC8190945)
Supplement: sj-pdf-1-ine-10.1177_1591019920977552.pdf [file sj-pdf-1-ine-10.1177_1591019920977552.pdf]

## SUPPLEMENTARY MATERIAL

**Table 1.** Primary and secondary outcomes excluding MT patients.

|                                           | <b>Emergency CAS</b> | <b>Elective CAS</b> | <b>P value*</b> |
|-------------------------------------------|----------------------|---------------------|-----------------|
|                                           | <b>n= 57</b>         | <b>n= 104</b>       |                 |
| <b>Primary outcome - composite, n (%)</b> | 3/53 (5.6)           | 1/98 (1)            | 0.124           |
| Deaths                                    | 1 (1.9)              | 0                   | 1               |
| Stroke                                    | 2 (3.7)              | 1 (1)               | 0.287           |
| Myocardial infarction                     | 0                    | 0                   | 1               |
| <b>Safety outcome – composite, n (%)</b>  | 2 (3.5)              | 5 (4.8)             | 1               |
| Retroperitoneal hematoma                  | 1 (1.7)              | 0                   | 1               |
| Bradycardia                               | 1 (1.7)              | 4 (3.8)             | 0.656           |
| Hypotension                               | 0                    | 2 (1)               | 1               |

CAS indicates carotid artery stenting.

\* Fisher's exact test.

Note: One elective CAS patient presented both bradycardia and hypotension.
